# Supplementary material for: Ligand sensitized strong luminescence from Eu3+-doped LiYF4 nanocrystals: a photon down-shifting strategy to increase solar-to-current conversion efficiency
Source: Royal Society of Chemistry journal article supplement (doi:10.1039/c7dt01339f), 2017-01-01
Supplement: c7dt01339f1.pdf [file c7dt01339f1.pdf]

## Supporting Information

### **Ligand sensitized strong luminescence from Eu<sup>3+</sup>-doped LiYF<sub>4</sub> nanocrystals: A photon downshifting strategy to increase solar to current conversion efficiency**

TuhinSamanta,<sup>a</sup> Sourav. K. Jana,<sup>a</sup> Athma E. Praveen<sup>a</sup> and VenkataramananMahalingam<sup>a</sup>

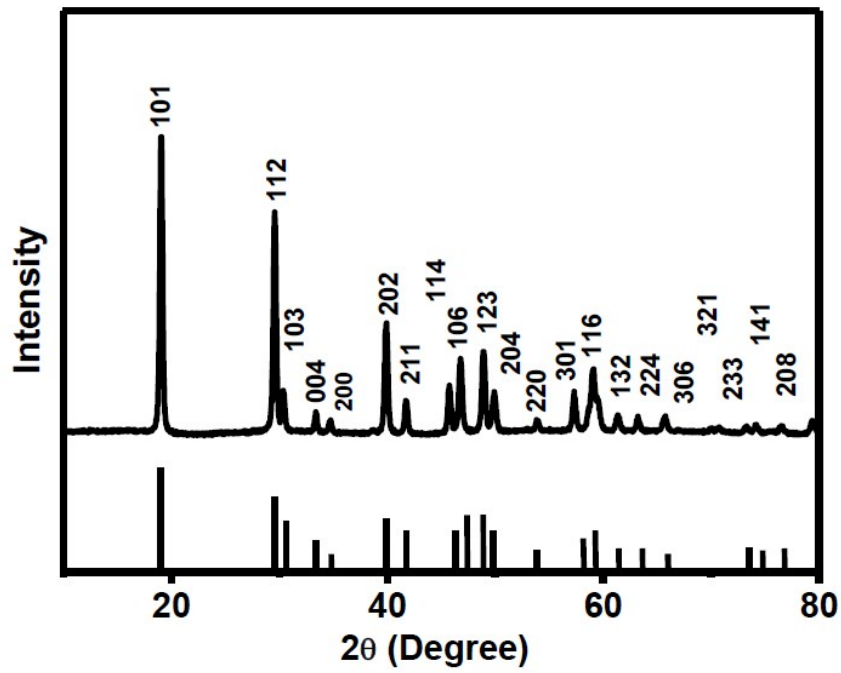

**Fig. S1** XRD patterns of bare  $\text{Eu}^{3+}$  doped  $\text{LiYF}_4$  nanocrystals along with standard pattern.

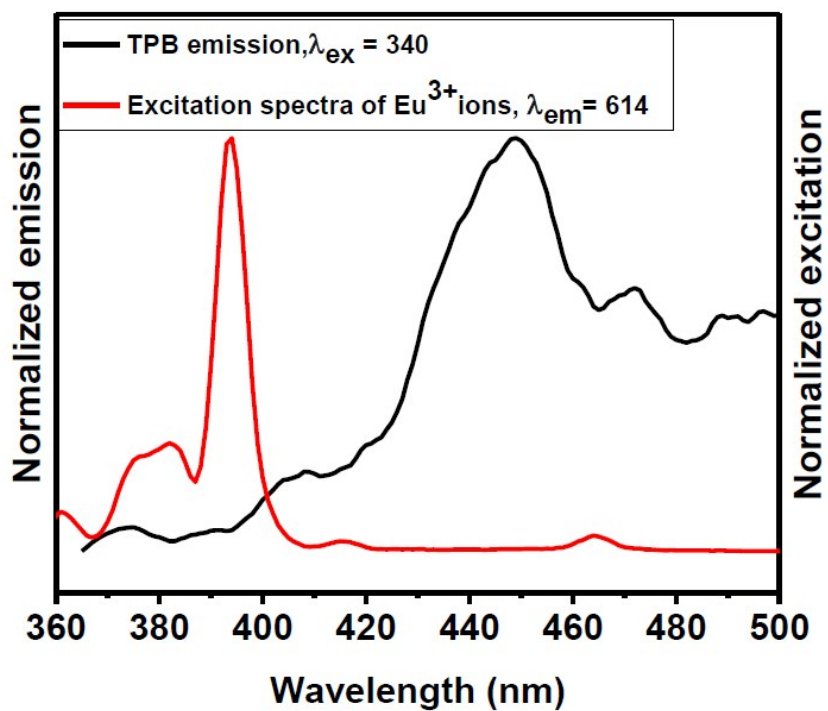

**Fig. S2.** Overlap between the emission spectrum of the TPB and the excitation spectrum of the  $\text{Eu}^{3+}$ -doped  $\text{LiYF}_4$  NCs.

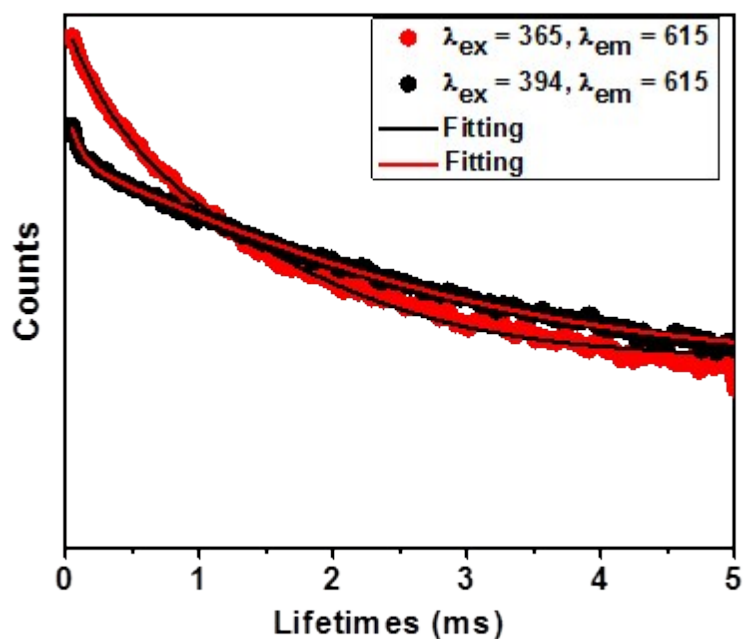

**Fig. S3.** The lifetime of TPB capped  $\text{Eu}^{3+}$ -doped  $\text{LiYF}_4$  NCs, by exciting the nanocrystals at  $\lambda_{\text{ex}} = 394$  nm and  $\lambda_{\text{ex}} = 365$  nm and monitoring the emission at  $\lambda_{\text{em}} = 615$  nm.

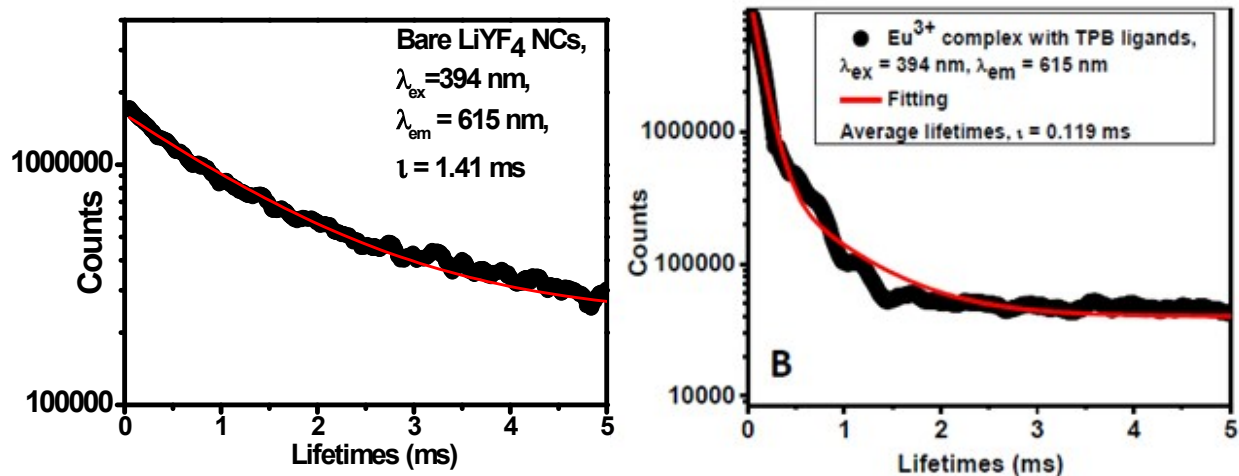

**Fig. S4.** The lifetime of (A) bare Eu<sup>3+</sup>-doped LiYF<sub>4</sub> NCs and (B) Eu<sup>3+</sup>-TPB complex by exciting the nanocrystals at  $\lambda_{\text{ex}} = 394 \text{ nm}$  and monitoring the emission at  $\lambda_{\text{em}} = 615 \text{ nm}$ .

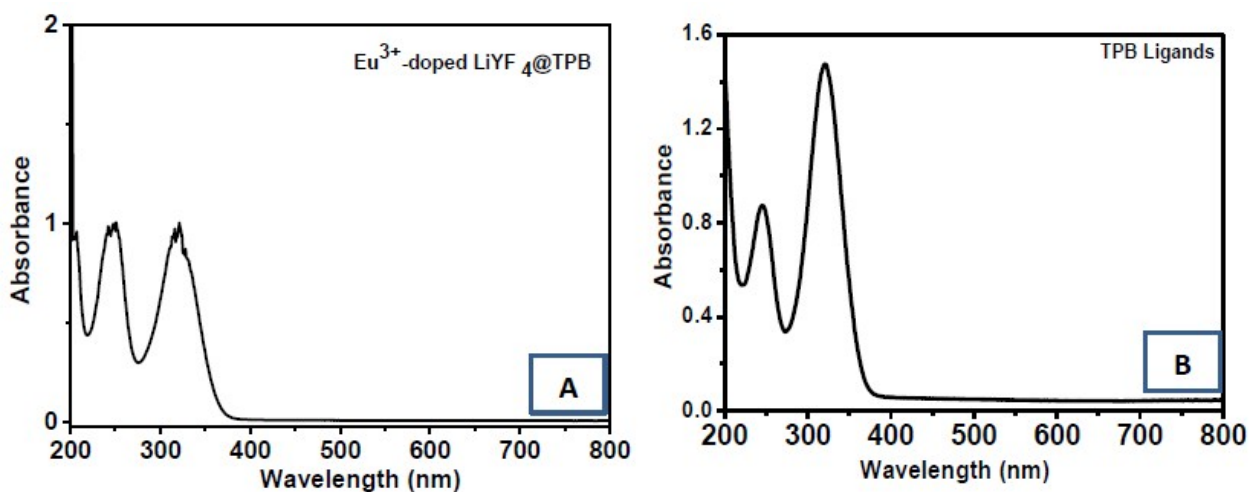

**Fig. S5.** The absorbance spectra of (A) TPB capped Eu<sup>3+</sup>-doped LiYF<sub>4</sub> NCs in water (0.1 wt%). (B) TPB ligands ( $1 \times 10^{-5} \text{ M}$ ).

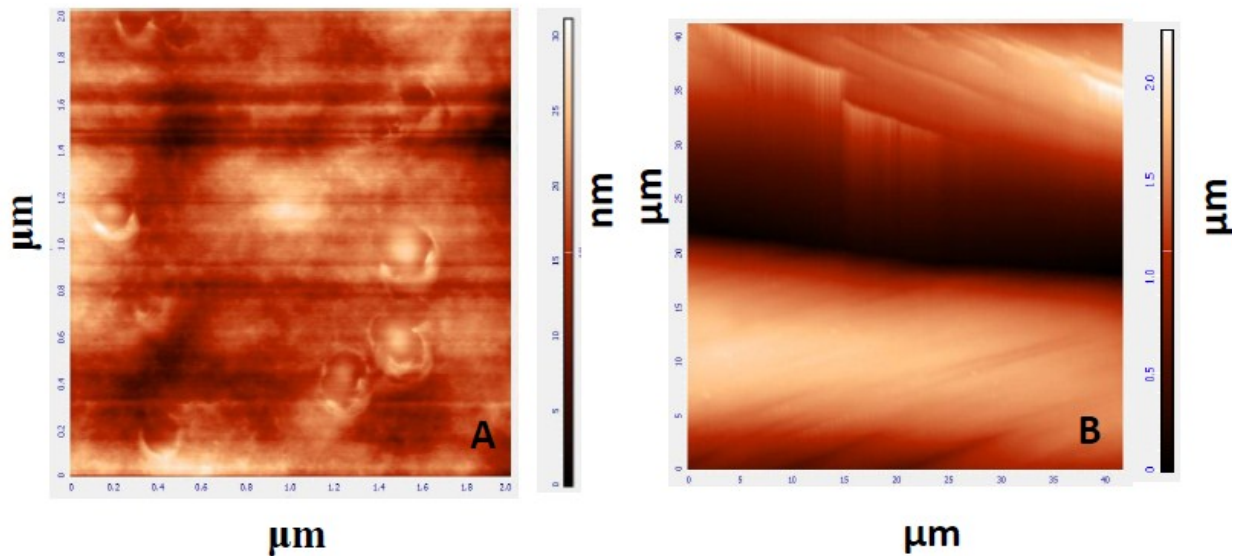

**Fig. S6.** AFM image of the EVA film of TPB capped  $\text{Eu}^{3+}$ -doped  $\text{LiYF}_4$  nanocrystals (A) and thickness of the film (B)

### Quantum Yield Calculation

The quantum yield was determined by comparing the luminescence with quinine-sulphate. The quantum yield of TPB capped  $\text{Eu}^{3+}$ -doped  $\text{LiYF}_4$ NCs and bare  $\text{Eu}^{3+}$ -doped  $\text{LiYF}_4$  NCs were calculated from the following equation-  $Q_{\text{sample}} = Q_{\text{ref}} (A/A_{\text{ref}}) (I_{\text{ref}}/I) (n^2/n_{\text{ref}}^2)$  where,  $Q_{\text{sample}}$  and  $Q_{\text{ref}}$  are the quantum yields of the nanocrystals and quinine-sulphate respectively,  $A$  is the absorbance,  $I$  is the integrated area of photoluminescence spectra, and  $n$  is the refractive index of the solution. The quantum yield of Quinine sulphate as the reference is 0.546. The quantum yield of  $\text{Eu}^{3+}$  doped TPB capped and bare NCs were estimated by comparing the integrated emission spectra of the aqueous dispersion with that of Quinine sulphate solution. The sample and the reference have the identical optical density at the excitation wavelength. The calculated quantum yield was about 5% for  $\text{Eu}^{3+}$ -doped  $\text{LiYF}_4$ NCs and 31 % TPB capped  $\text{Eu}^{3+}$ -doped  $\text{LiYF}_4$ NCs.
